# Supplementary material for: Antioxidant treatment ameliorates prefrontal hypomyelination and cognitive deficits in a rat model of schizophrenia
Source: PubMed Central journal article supplement (PMC8115238; doi:10.1038/s41386-021-00964-0), 2021-02-09
Supplement: 41386_2021_964_MOESM1_ESM.pdf [file 41386_2021_964_MOESM1_ESM.pdf]

## **Supplementary Material**

Maas et al., Antioxidant treatment ameliorates prefrontal hypomyelination and cognitive deficits in a rat model of schizophrenia

Supplementary Table 1 – Primer sequences.

| Gene and abbreviation            |                                                                              | Forward primer 5'-3'          | Reverse primer 5'-3'           |
|----------------------------------|------------------------------------------------------------------------------|-------------------------------|--------------------------------|
| <b>Housekeeping genes</b>        |                                                                              |                               |                                |
| <b><i>β-actin</i></b>            | Beta-actin                                                                   | CCTTCCTGGGTATGGAATCCTGT       | TAGAGCCACCAATCCACACA           |
| <b><i>Ppia</i></b>               | Peptidyl-prolyl cis-trans isomerase A                                        | AGCACTGGGGAGAAAGGATT          | AGCCACTCAGTCTTGGCAGT           |
| <b><i>Gapdh</i></b>              | Glyceraldehyde-3-phosphate                                                   | GGGTGTGAACCACGAGAAAT          | ACTGTGGTCATGAGCCCTTC           |
| <b><i>Ywhaz</i></b>              | Tyrosine 3-monooxygenase/tryptophan 5-monooxygenase activation protein, zeta | TTGAGCAGAAGACGGAAGGT          | GAAGCATTGGGGATCAAGAA           |
| <b>Myelin-related genes</b>      |                                                                              |                               |                                |
| <b><i>Cldn11</i></b>             | Claudin 11                                                                   | CGCAAATGGACGAACTGGG           | TGCACGTAACCAGGGAGGAT           |
| <b><i>Mag</i></b>                | Myelin-associated glycoprotein                                               | AAGCCAGACCATCCAACCTTC         | CTCCTGATTCCGCTCCAAGT           |
| <b><i>Mbp</i></b>                | Myelin basic protein                                                         | CCCTACTCCATCCTCAGACTTTC<br>TT | TGGCGGTGTGCCTGTCTAT            |
| <b><i>Mobp</i></b>               | Myelin-associated oligodendrocytebasic protein                               | AATACCTGCAGGGCAACAAAG         | TCTGGTTCTTGGAGAGCCTGG          |
| <b><i>Mog</i></b>                | Myelin oligodendrocyte glycoprotein                                          | CGCCGTGGAGTTGAAAGTAG          | GCACGGAGTTTTCTCTAGT            |
| <b><i>Opalin</i></b>             | Oligodendrocytic Myelin Paranodal And Inner Loop Protein                     | ACCCTGATCCAGCGAAGAAG          | TGACTGCCTAGGATTCTCGGAT<br>A    |
| <b><i>Plp1</i></b>               | Proteolipid protein 1                                                        | GGGCCTGAGCGCAACGGTAA          | CAGGCACAGCAGAGCAGGCAA          |
| <b>Glutathione-related genes</b> |                                                                              |                               |                                |
| <b><i>Gsta4</i></b>              | Glutathione-S-transferase alpha4                                             | GCCGCCAAGTACAACCTTGTA         | CACTGCTAAAGCTAGGCTCTCTT<br>CTT |
| <b><i>Gstm4</i></b>              | Glutathione-S-transferase mu 4                                               | GCCTAGGCCCTGGTTTTTC           | TCTTCACAGCAGCACAGCAACT         |
| <b><i>Prdx6</i></b>              | Peroxiredoxin 6                                                              | TGACTGGAAGAAGGGAGAGAG<br>TGT  | ATGGGAGCTCTTTGGTGAAGAC         |
| <b><i>Gclc</i></b>               | Glutamate—cysteine ligase catalytic subunit                                  | AGAGGACAAACCCCAACCAC          | TCGTGCAAAGAGCCTGATGT           |
| <b><i>Gss</i></b>                | Glutathione synthetase                                                       | AGCGTGCCATAGAGAACGAG          | GCTTCCCAGTTCTGTGCGTT           |
| <b><i>Gstm1</i></b>              | Glutathione-S-transferase mu 1                                               | GTCATGCCACATAGTCTTCATT<br>C   | AGTTCAGGGCAGACCTCAAATC         |

|              |                                |                       |                             |
|--------------|--------------------------------|-----------------------|-----------------------------|
| <b>Gstm6</b> | Glutathione-S-transferase mu 6 | CTGAGCGTTGCTATCTCGGAG | TTCTGTGTATTCCAGGAGCAGC      |
| <b>Anpep</b> | Alanyl Aminopeptidase          | CCCATCAGTGGTTTGGCAAC  | CATAGTCAGCACCCAGAAATTC<br>C |

**Supplementary Table 2** – Statistical values of Independent samples T-test with Benjamini Hochberg multiple comparisons correction on qPCR expression data presented in Figure 1.

| Age        | Gene  | t-value | df     | p-value | n-number before outlier exclusion | n-number after outlier exclusion |
|------------|-------|---------|--------|---------|-----------------------------------|----------------------------------|
| <b>P0</b>  | gstm1 | -3.184  | 19     | 0.005*  | APO-SUS n=12<br>APO-UNSUS n=9     | No significant outliers          |
|            | gstm4 | 4.841   | 19     | 0.000*  | APO-SUS n=12<br>APO-UNSUS n=9     | No significant outliers          |
|            | gsta4 | 3.652   | 18     | 0.002*  | APO-SUS n=12<br>APO-UNSUS n=8     | No significant outliers          |
|            | prdx6 | -1.402  | 19     | 0.177   | APO-SUS n=12<br>APO-UNSUS n=9     | No significant outliers          |
|            | gstm6 | -3.468  | 19     | 0.003*  | APO-SUS n=12<br>APO-UNSUS n=9     | No significant outliers          |
|            | anpep | -3.070  | 8.378  | 0.015*  | APO-SUS n=12<br>APO-UNSUS n=9     | No significant outliers          |
| <b>P7</b>  | gstm1 | -3.184  | 19     | 0.005*  | APO-SUS n=11<br>APO-UNSUS n=11    | No significant outliers          |
|            | gstm4 | 5.494   | 15.065 | 0.000*  | APO-SUS n=11<br>APO-UNSUS n=12    | No significant outliers          |
|            | gsta4 | 7.191   | 20     | 0.000*  | APO-SUS n=11<br>APO-UNSUS n=11    | No significant outliers          |
|            | prdx6 | -3.100  | 20     | 0.006*  | APO-SUS n=10<br>APO-UNSUS n=12    | No significant outliers          |
|            | gstm6 | -8.665  | 21     | 0.000*  | APO-SUS n=11<br>APO-UNSUS n=12    | No significant outliers          |
|            | anpep | -3.979  | 20     | 0.001*  | APO-SUS n=11<br>APO-UNSUS n=11    | No significant outliers          |
| <b>P14</b> | gstm1 | -2.296  | 20     | 0.033*  | APO-SUS n=12<br>APO-UNSUS n=12    | No significant outliers          |
|            | gstm4 | 10.977  | 22     | 0.000*  | APO-SUS n=12<br>APO-UNSUS n=12    | No significant outliers          |
|            | gsta4 | 8.099   | 20     | 0.000*  | APO-SUS n=11<br>APO-UNSUS n=11    | No significant outliers          |
|            | prdx6 | -8.349  | 22     | 0.000*  | APO-SUS n=12<br>APO-UNSUS n=12    | No significant outliers          |
|            | gstm6 | -8.912  | 22     | 0.000*  | APO-SUS n=12<br>APO-UNSUS n=12    | No significant outliers          |
|            | anpep | -2.374  | 22     | 0.027*  | APO-SUS n=12<br>APO-UNSUS n=12    | No significant outliers          |

|             |       |        |        |        |                                |                              |
|-------------|-------|--------|--------|--------|--------------------------------|------------------------------|
| <b>P21</b>  | gstm1 | -4.385 | 22     | 0.000* | APO-SUS n=12<br>APO-UNSUS n=12 | No significant outliers      |
|             | gstm4 | 6.433  | 20     | 0.000* | APO-SUS n=10<br>APO-UNSUS n=12 | No significant outliers      |
|             | gsta4 | 8.913  | 18     | 0.000* | APO-SUS n=9<br>APO-UNSUS n=11  | No significant outliers      |
|             | prdx6 | -6.683 | 16.914 | 0.000* | APO-SUS n=10<br>APO-UNSUS n=12 | No significant outliers      |
|             | gstm6 | -4.280 | 20     | 0.000* | APO-SUS n=10<br>APO-UNSUS n=11 | No significant outliers      |
|             | anpep | -2.784 | 19     | 0.012* | APO-SUS n=10<br>APO-UNSUS n=11 | No significant outliers      |
| <b>P90</b>  | gstm1 | -3.829 | 16.795 | 0.001* | APO-SUS n=10<br>APO-UNSUS n=11 | No significant outliers      |
|             | gstm4 | 4.446  | 5.128  | 0.006* | APO-SUS n=6<br>APO-UNSUS n=6   | APO-SUS n=4<br>APO-UNSUS n=6 |
|             | gsta4 | 2.526  | 10     | 0.030* | APO-SUS n=6<br>APO-UNSUS n=6   | No significant outliers      |
|             | prdx6 | -3.513 | 10     | 0.006* | APO-SUS n=6<br>APO-UNSUS n=6   | No significant outliers      |
|             | gstm6 | -3.111 | 10     | 0.011* | APO-SUS n=6<br>APO-UNSUS n=6   | APO-SUS n=5<br>APO-UNSUS n=6 |
|             | anpep | -1.783 | 10     | 0.105  | APO-SUS n=6<br>APO-UNSUS n=6   | APO-SUS n=6<br>APO-UNSUS n=5 |
| <b>P365</b> | gstm1 | -3.760 | 10     | 0.004* | APO-SUS n=6<br>APO-UNSUS n=6   | APO-SUS n=6<br>APO-UNSUS n=5 |
|             | gstm4 | 3.921  | 14     | 0.002* | APO-SUS n=8<br>APO-UNSUS n=8   | No significant outliers      |
|             | gsta4 | 2.399  | 14     | 0.031* | APO-SUS n=8<br>APO-UNSUS n=8   | No significant outliers      |
|             | prdx6 | -3.719 | 14     | 0.002* | APO-SUS n=8<br>APO-UNSUS n=8   | No significant outliers      |
|             | gstm6 | -1.673 | 14     | 0.117  | APO-SUS n=8<br>APO-UNSUS n=8   | No significant outliers      |
|             | anpep | -1.170 | 14     | 0.261  | APO-SUS n=8<br>APO-UNSUS n=8   | No significant outliers      |
|             | gstm1 | 0.684  | 14     | 0.505  | APO-SUS n=8<br>APO-UNSUS n=8   | No significant outliers      |

\* Significant

**Supplementary Table 3** – Statistical values of Independent samples T-test with Benjamini Hochberg multiple comparisons correction of qPCR expression data presented in Figure 2.

| APO-SUS versus APO-UNSUS | APO-SUS versus APO-SUS+NAC | n-number before | n-number after |
|--------------------------|----------------------------|-----------------|----------------|
|--------------------------|----------------------------|-----------------|----------------|

| Gene         | t-value | df     | p-value | t-value | df     | p-value | outlier exclusion                                                                 | outlier exclusion                                                                 |
|--------------|---------|--------|---------|---------|--------|---------|-----------------------------------------------------------------------------------|-----------------------------------------------------------------------------------|
| <b>Prdx6</b> | -3.157  | 15     | 0.007*  | 0.021   | 16     | 0.983   | APO-SUS n=9<br>APO-SUS +<br>NAC n=9<br>APO-UNSUS<br>n=8<br>APO-UNSUS +<br>NAC n=8 | No significant outliers                                                           |
| <b>Gstm4</b> | 1.115   | 10.736 | 0.289   | -0.197  | 11.573 | 0.847   | APO-SUS n=9<br>APO-SUS +<br>NAC n=9<br>APO-UNSUS<br>n=8<br>APO-UNSUS +<br>NAC n=8 | No significant outliers                                                           |
| <b>Anpep</b> | -2.362  | 14     | 0.033*  | -3.070  | 16     | 0.007*  | APO-SUS n=9<br>APO-SUS +<br>NAC n=9<br>APO-UNSUS<br>n=8<br>APO-UNSUS +<br>NAC n=8 | APO-SUS n=9<br>APO-SUS +<br>NAC n=9<br>APO-UNSUS<br>n=7<br>APO-UNSUS +<br>NAC n=8 |
| <b>Gstm6</b> | -2.837  | 6.303  | 0.028*  | -3.139  | 8.533  | 0.013*  | APO-SUS n=8<br>APO-SUS +<br>NAC n=9<br>APO-UNSUS<br>n=7<br>APO-UNSUS +<br>NAC n=8 | APO-SUS n=8<br>APO-SUS +<br>NAC n=9<br>APO-UNSUS<br>n=6<br>APO-UNSUS +<br>NAC n=8 |
| <b>Gsta4</b> | -1.190  | 14     | 0.254   | -6.897  | 15     | 0.000*  | APO-SUS n=9<br>APO-SUS +<br>NAC n=9<br>APO-UNSUS<br>n=8<br>APO-UNSUS +<br>NAC n=8 | APO-SUS n=9<br>APO-SUS +<br>NAC n=9<br>APO-UNSUS<br>n=7<br>APO-UNSUS +<br>NAC n=8 |
| <b>Gstm1</b> | -2.568  | 14     | 0.022*  | -5.476  | 15     | 0.000*  | APO-SUS n=9<br>APO-SUS +<br>NAC n=9<br>APO-UNSUS<br>n=8<br>APO-UNSUS +<br>NAC n=8 | APO-SUS n=9<br>APO-SUS +<br>NAC n=8<br>APO-UNSUS<br>n=7<br>APO-UNSUS +<br>NAC n=8 |
| <b>Gclc</b>  | -1.782  | 14     | 0.096   | -4.570  | 15     | 0.000*  | APO-SUS n=9<br>APO-SUS +<br>NAC n=9<br>APO-UNSUS<br>n=8<br>APO-UNSUS +<br>NAC n=8 | APO-SUS n=9<br>APO-SUS +<br>NAC n=9<br>APO-UNSUS<br>n=7<br>APO-UNSUS +<br>NAC n=8 |
| <b>Gss</b>   | -2.415  | 7.096  | 0.046*  | -3.013  | 9.440  | 0.014*  | APO-SUS n=9<br>APO-SUS +<br>NAC n=9                                               | No significant outliers                                                           |

|              |        |    |        |        |    |        |                                                                                   |                                                                                   |
|--------------|--------|----|--------|--------|----|--------|-----------------------------------------------------------------------------------|-----------------------------------------------------------------------------------|
|              |        |    |        |        |    |        | APO-UNSUS<br>n=7                                                                  |                                                                                   |
|              |        |    |        |        |    |        | APO-UNSUS +<br>NAC n=8                                                            |                                                                                   |
| <b>Gstm7</b> | -3.175 | 13 | 0.007* | -6.484 | 13 | 0.000* | APO-SUS n=8<br>APO-SUS +<br>NAC n=8<br>APO-UNSUS<br>n=7<br>APO-UNSUS +<br>NAC n=8 | APO-SUS n=8<br>APO-SUS +<br>NAC n=7<br>APO-UNSUS<br>n=7<br>APO-UNSUS +<br>NAC n=8 |

\* Significant

**Supplementary Table 4** – Statistical values of Independent samples T-test with Benjamini Hochberg multiple comparisons correction of qPCR expression data presented in Figure 3.

| Gene          | APO-SUS versus APO-UNSUS |    |         | APO-SUS versus APO-SUS+NAC |    |         | n-number before outlier exclusion                                        | n-number after outlier exclusion                                         |
|---------------|--------------------------|----|---------|----------------------------|----|---------|--------------------------------------------------------------------------|--------------------------------------------------------------------------|
|               | t-value                  | df | p-value | t-value                    | df | p-value |                                                                          |                                                                          |
| <b>Mog</b>    | -3.719                   | 15 | 0.002*  | -6.022                     | 15 | 0.002*  | APO-SUS n=9<br>APO-SUS + NAC n=9<br>APO-UNSUS n=8<br>APO-UNSUS + NAC n=8 | APO-SUS n=9<br>APO-SUS + NAC n=8<br>APO-UNSUS n=8<br>APO-UNSUS + NAC n=8 |
| <b>Plp</b>    | -2.495                   | 14 | 0.026*  | -4.769                     | 15 | 0.026*  | APO-SUS n=9<br>APO-SUS + NAC n=9<br>APO-UNSUS n=7<br>APO-UNSUS + NAC n=8 | APO-SUS n=9<br>APO-SUS + NAC n=8<br>APO-UNSUS n=7<br>APO-UNSUS + NAC n=8 |
| <b>Mag</b>    | -2.901                   | 13 | 0.012*  | -4.253                     | 15 | 0.012*  | APO-SUS n=9<br>APO-SUS + NAC n=9<br>APO-UNSUS n=8<br>APO-UNSUS + NAC n=8 | APO-SUS n=9<br>APO-SUS + NAC n=8<br>APO-UNSUS n=7<br>APO-UNSUS + NAC n=8 |
| <b>Mobp</b>   | -2.929                   | 14 | 0.011*  | -2.942                     | 14 | 0.011*  | APO-SUS n=8<br>APO-SUS + NAC n=8<br>APO-UNSUS n=8<br>APO-UNSUS + NAC n=8 | No significant outliers                                                  |
| <b>Cldn11</b> | -3.740                   | 13 | 0.002*  | -4.424                     | 14 | 0.002*  | APO-SUS n=8<br>APO-SUS + NAC n=8<br>APO-UNSUS n=7<br>APO-UNSUS + NAC n=8 | No significant outliers                                                  |
| <b>Mbp</b>    | -2.162                   | 14 | 0.048*  | -3.010                     | 16 | 0.048*  | APO-SUS n=9<br>APO-SUS + NAC n=9<br>APO-UNSUS n=8                        | APO-SUS n=9<br>APO-SUS + NAC n=0<br>APO-UNSUS n=7                        |

|               |        |    |        |        |    |        |                                                                                |                                                                             |
|---------------|--------|----|--------|--------|----|--------|--------------------------------------------------------------------------------|-----------------------------------------------------------------------------|
|               |        |    |        |        |    |        | APO-UNSUS +<br>NAC n=8                                                         | APO-UNSUS + NAC<br>n=8                                                      |
| <b>Opalin</b> | -4.025 | 13 | 0.001* | -4.667 | 15 | 0.001* | APO-SUS n=9<br>APO-SUS + NAC<br>n=9<br>APO-UNSUS n=7<br>APO-UNSUS +<br>NAC n=8 | APO-SUS n=8<br>APO-SUS + NAC n=9<br>APO-UNSUS n=8<br>APO-UNSUS + NAC<br>n=8 |

\* Significant

**Supplementary Table 5** – Ingenuity pathway analysis (IPA) of RNA-sequencing data from medial prefrontal cortex (mPFC) of APO-SUS versus APO-UNSUS rats.

| Ingenuity Canonical Pathways                                     | -log(B-H<br>p-value) | Ratio |
|------------------------------------------------------------------|----------------------|-------|
| <b>Glutathione-mediated Detoxification</b>                       | 2.69                 | 0.258 |
| <b>Glutathione Redox Reactions I</b>                             | 2.02                 | 0.25  |
| <b>Complement System</b>                                         | 1.87                 | 0.189 |
| <b>Cytotoxic T Lymphocyte-mediated Apoptosis of Target Cells</b> | 1.6                  | 0.188 |
| <b>Calcium-induced T Lymphocyte Apoptosis</b>                    | 2.56                 | 0.167 |

**Supplementary Table 6** - Genes in Ingenuity pathway analysis (IPA) canonical pathway ‘Glutathione-mediated detoxification’. Transcriptome-wide analysis of APO-SUS and APO-UNSUS medial prefrontal cortex (mPFC) combined with IPA revealed that this pathway represents the most significantly enriched pathway.

| Symbol       | Entrez Gene Name                       | Ratio | Corrected p-value |
|--------------|----------------------------------------|-------|-------------------|
| <b>Gsta1</b> | glutathione S-transferase alpha 1      | 1.95  | 0.0264            |
| <b>GSTA1</b> | glutathione S-transferase alpha 1      | -2.01 | 0.00111           |
| <b>Gsta4</b> | glutathione S-transferase, alpha 4     | 2.02  | 0.00025           |
| <b>GSTM4</b> | glutathione S-transferase mu 4         | 1.2   | 0.0354            |
| <b>GSTM5</b> | glutathione S-transferase mu 5         | -1.21 | 0.000000969       |
| <b>Gstt1</b> | glutathione S-transferase, theta 1     | -1.65 | 0.00713           |
| <b>HPGDS</b> | hematopoietic prostaglandin D synthase | 10.42 | 0.000794          |
| <b>MGST1</b> | microsomal glutathione S-transferase 1 | 1.46  | 0.00282           |

**Supplementary Table 7** - Genes in Ingenuity pathway analysis (IPA) canonical pathway ‘Glutathione redox reactions I’. Transcriptome-wide analysis of APO-SUS and APO-UNSUS medial prefrontal cortex (mPFC) combined with IPA revealed that this pathway represents the second-most significantly enriched pathway.

| Symbol       | Entrez Gene Name                  | Ratio | Corrected p-value |
|--------------|-----------------------------------|-------|-------------------|
| <b>GPX3</b>  | glutathione peroxidase 3          | -1.2  | 0.0183            |
| <b>Gsta1</b> | glutathione S-transferase alpha 1 | 1.95  | 0.0264            |
| <b>GSTA1</b> | glutathione S-transferase alpha 1 | -2.01 | 0.00111           |

|              |                                        |       |          |
|--------------|----------------------------------------|-------|----------|
| <b>Gstt1</b> | glutathione S-transferase, theta 1     | -1.65 | 0.00713  |
| <b>MGST1</b> | microsomal glutathione S-transferase 1 | 1.46  | 0.00282  |
| <b>PRDX6</b> | peroxiredoxin 6                        | -1.64 | 0.00E+00 |

**Supplementary Table 8** - Top 35 most significantly differentially expressed genes in APO-SUS *versus* APO-UNSUS medial prefrontal cortex (mPFC) as revealed by RNA-sequencing analysis.

| #  | Ratio   | Corrected p-value | Symbol            | Gene name                                                                             |
|----|---------|-------------------|-------------------|---------------------------------------------------------------------------------------|
| 1  | -109.31 | 0.00E+00          | <b>Igh-1a</b>     | Immunoglobulin heavy chain 1a (serum IgG2a)                                           |
| 2  | -68.51  | 0.00E+00          | <b>690499</b>     | rCG64263-like                                                                         |
| 3  | -60.45  | 0.00E+00          | <b>100361105</b>  | Igh protein-like                                                                      |
| 4  | 12.53   | 0.00E+00          | <b>Spag6</b>      | Sperm associated antigen 6                                                            |
| 5  | -7.92   | 0.00E+00          | <b>309627</b>     | RT1 class I, locus A3                                                                 |
| 6  | 5.81    | 0.00E+00          | <b>365613</b>     | hypothetical gene supported by X60212                                                 |
| 7  | 4.71    | 0.00E+00          | <b>Vwa3a</b>      | Von Willebrand factor A domain containing 3A                                          |
| 8  | -4.6    | 0.00E+00          | <b>Ghdc</b>       | GH3 domain containing                                                                 |
| 9  | -3.97   | 0.00E+00          | <b>Prss12</b>     | Protease, serine, 12 neurotrypsin (motopsin)                                          |
| 10 | -3.42   | 0.00E+00          | <b>Acsn3</b>      | Acyl-CoA synthetase medium-chain family member 3                                      |
| 11 | -3.05   | 0.00E+00          | <b>LOC362863</b>  | First gene upstream of Nt5dc3                                                         |
| 12 | 3       | 0.00E+00          | <b>RGD1303232</b> | Phytn_dehydro and Pyr_redox domain containing protein RGD1303232                      |
| 13 | -2.85   | 0.00E+00          | <b>Aph1b</b>      | Anterior pharynx defective 1 homolog B (C. elegans)                                   |
| 14 | -2.81   | 0.00E+00          | <b>306478</b>     | ATP synthase, H <sup>+</sup> transporting, mitochondrial F0 complex, subunit d-like 1 |
| 15 | -2.69   | 0.00E+00          | <b>368153</b>     | RT1 class I, locus CE7                                                                |
| 16 | -2.63   | 0.00E+00          | <b>292539</b>     | similar to 60S ribosomal protein L17 (L23)                                            |
| 17 | 2.49    | 0.00E+00          | <b>Ifi271</b>     | Interferon, alpha-inducible protein 27-like                                           |
| 18 | 2.31    | 0.00E+00          | <b>Zfp61</b>      | Zinc finger protein 61                                                                |



|           |       |          |                  |                                                               |
|-----------|-------|----------|------------------|---------------------------------------------------------------|
| <b>19</b> | -2.28 | 0.00E+00 | <b>Thumpd2</b>   | THUMP domain containing 2                                     |
| <b>20</b> | 2.19  | 0.00E+00 | <b>Rpl17</b>     | Ribosomal protein L17                                         |
| <b>21</b> | 2.02  | 0.00E+00 | <b>Pla2g4e</b>   | Phospholipase A2, group IVE                                   |
| <b>22</b> | -2    | 0.00E+00 | <b>Pex11a</b>    | Peroxisomal biogenesis factor 11 alpha                        |
| <b>23</b> | 1.87  | 0.00E+00 | <b>LOC361963</b> | Similar to phosphoglycerate mutase (EC 5.4.2.1) B chain – rat |
| <b>24</b> | -1.79 | 0.00E+00 | <b>Mobp*</b>     | Myelin-associated oligodendrocyte basic protein               |
| <b>25</b> | -1.79 | 0.00E+00 | <b>Cables2</b>   | Cdk5 and Abl enzyme substrate 2                               |
| <b>26</b> | -1.77 | 0.00E+00 | <b>St7l</b>      | Suppression of tumorigenicity 7-like                          |
| <b>27</b> | 1.75  | 0.00E+00 | <b>100362124</b> | intraflagellar transport 140                                  |
| <b>28</b> | -1.72 | 0.00E+00 | <b>Tmem119</b>   | Transmembrane protein 119                                     |
| <b>29</b> | -1.71 | 0.00E+00 | <b>RGD735029</b> | SEL1 domain containing protein RGD735029                      |
| <b>30</b> | -1.7  | 0.00E+00 | <b>Opalin*</b>   | Oligodendrocytic myelin paranodal and inner loop protein      |
| <b>31</b> | -1.69 | 0.00E+00 | <b>Mbp*</b>      | Myelin basic protein                                          |
| <b>32</b> | -1.67 | 0.00E+00 | <b>Mag*</b>      | Myelin-associated glycoprotein                                |
| <b>33</b> | -1.64 | 0.00E+00 | <b>Prdx6</b>     | Peroxiredoxin 6                                               |
| <b>34</b> | -1.63 | 0.00E+00 | <b>Plp1*</b>     | Proteolipid protein 1                                         |
| <b>35</b> | -1.59 | 0.00E+00 | <b>Ptgds</b>     | Prostaglandin D2 synthase (brain)                             |

\* Myelin-related genes

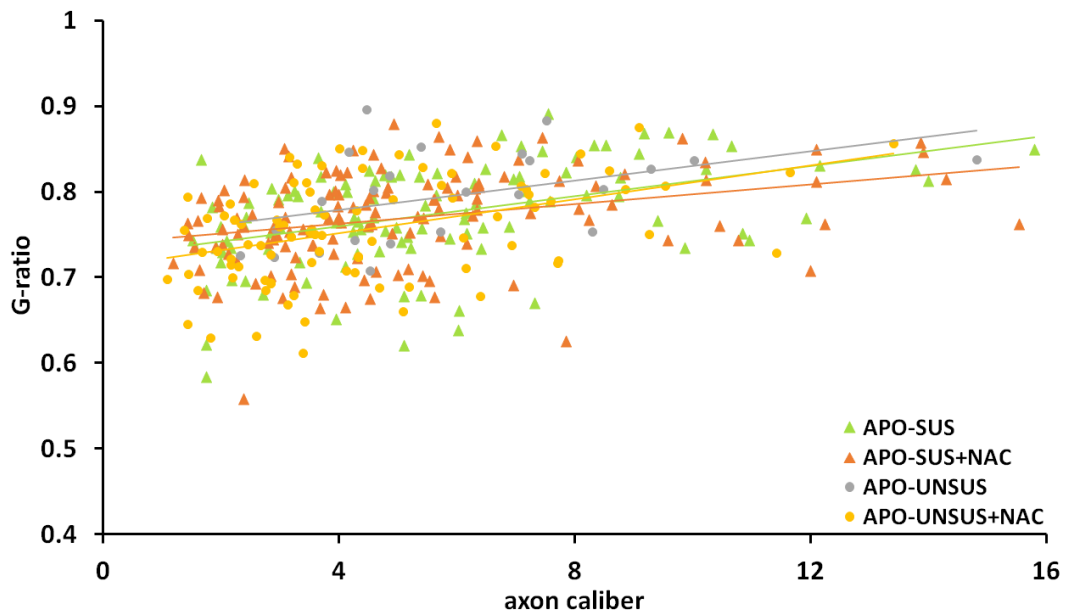

**Supplementary Figure S1 – Myelin thickness is not affected in APO-SUS medial prefrontal cortex (mPFC).** G-ratio versus axon caliber for all myelinated axons in the infralimbic (IL) subregion of the mPFC of APO-SUS and APO-UNSUS rats with and without NAC treatment.

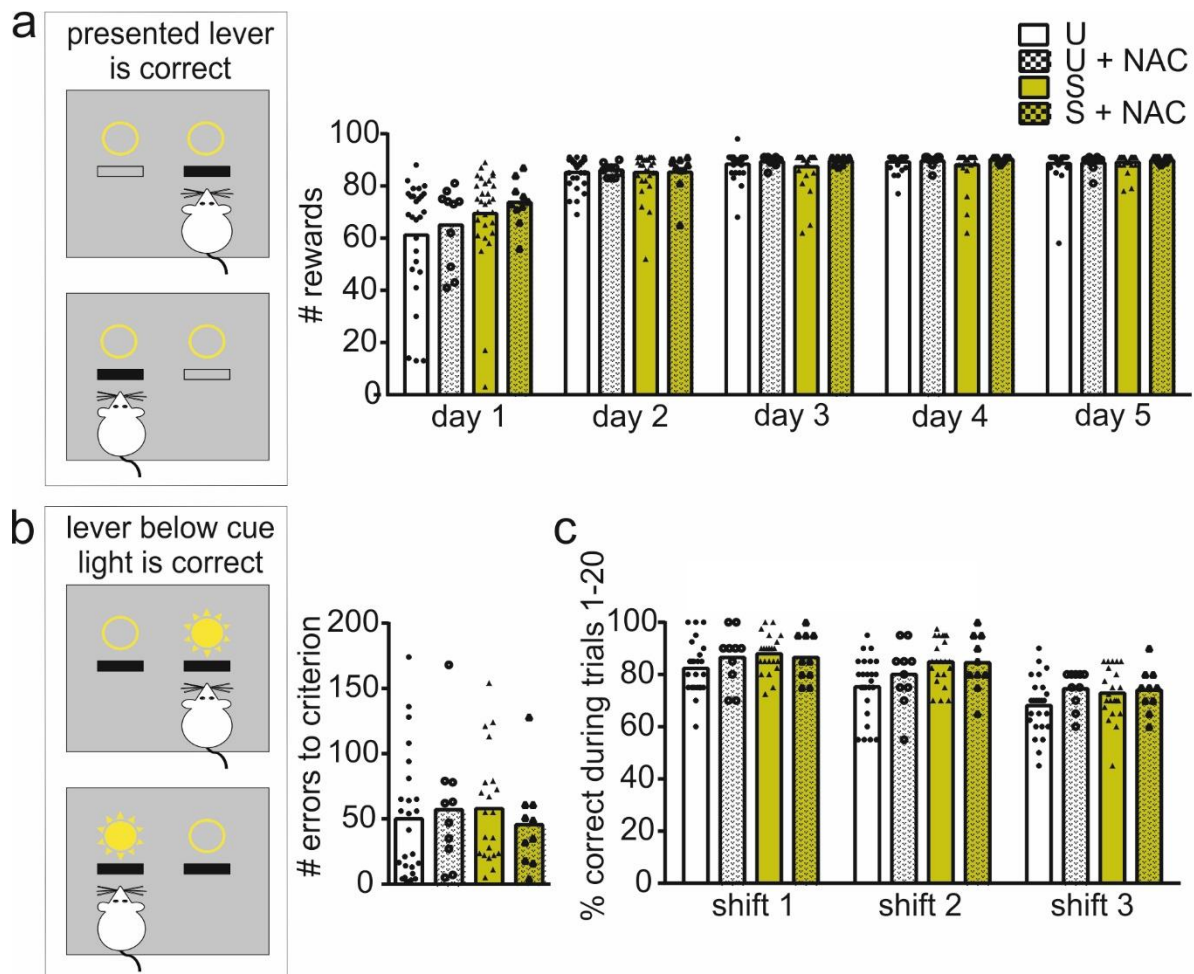

**Supplementary Figure S2 – No differences in the performance of APO-SUS and APO-UNSUS rats during retractable lever-press training and visual cue discrimination with and without NAC treatment.**

**(a)** Schematic representation and performance during retractable lever press training. Rats were required to press the lever they were presented with during 5 consecutive sessions, 1 session per day. The number of rewards in each session involving APO-SUS versus APO-UNSUS rats with and without NAC treatment is depicted. **(b)** Schematic representation and quantification of performance during the acquisition of the initial rule. Rats were required to press the lever above which a cue light was illuminated in order to receive a reward pellet. The number of errors until criterion of a streak of 10 correct trials was reached for APO-SUS and APO-UNSUS rats with and without NAC treatment is depicted (Two-way ANOVA interaction  $F[1,77]=0.603$ ,  $p=0.440$  main effects rat line  $F[1,77]=0.033$ ,  $p=0.857$  treatment  $F[1,77]=0.027$ ,  $p=0.870$ ). **(c)** Percentage correct trials during the first 20 trials of the extra-dimensional set-shifts in APO-SUS and APO-UNSUS rats with and without NAC treatment. Shift 1 Two-way ANOVA interaction  $F[1,77]=0.990$ ,  $p=0.323$  main effects rat line  $F[1,77]=0.990$ ,  $p=0.323$  treatment  $F[1,77]=0.280$ ,  $p=0.598$ ; Shift 2 Two-way ANOVA interaction  $F[1,77]=1.070$ ,  $p=0.304$  main effects rat line  $F[1,77]=6.457$ ,  $p=0.013$  treatment  $F[1,77]=0.489$ ,  $p=0.486$ ; Shift 3 Two-way ANOVA interaction  $F[1,77]=0.718$ ,  $p=0.400$  main effects rat line  $F[1,77]=0.439$ ,  $p=0.510$  treatment  $F[1,77]=1.792$ ,  $p=0.185$ .
